# Supplementary material for: Hypoblast Formation in Bovine Embryos Does Not Depend on NANOG
Source: MDPI journal article supplement (doi:10.3390/cells10092232), 2021-08-28
Supplement: s1 [file s1]

# Supplements

1. Figure S1

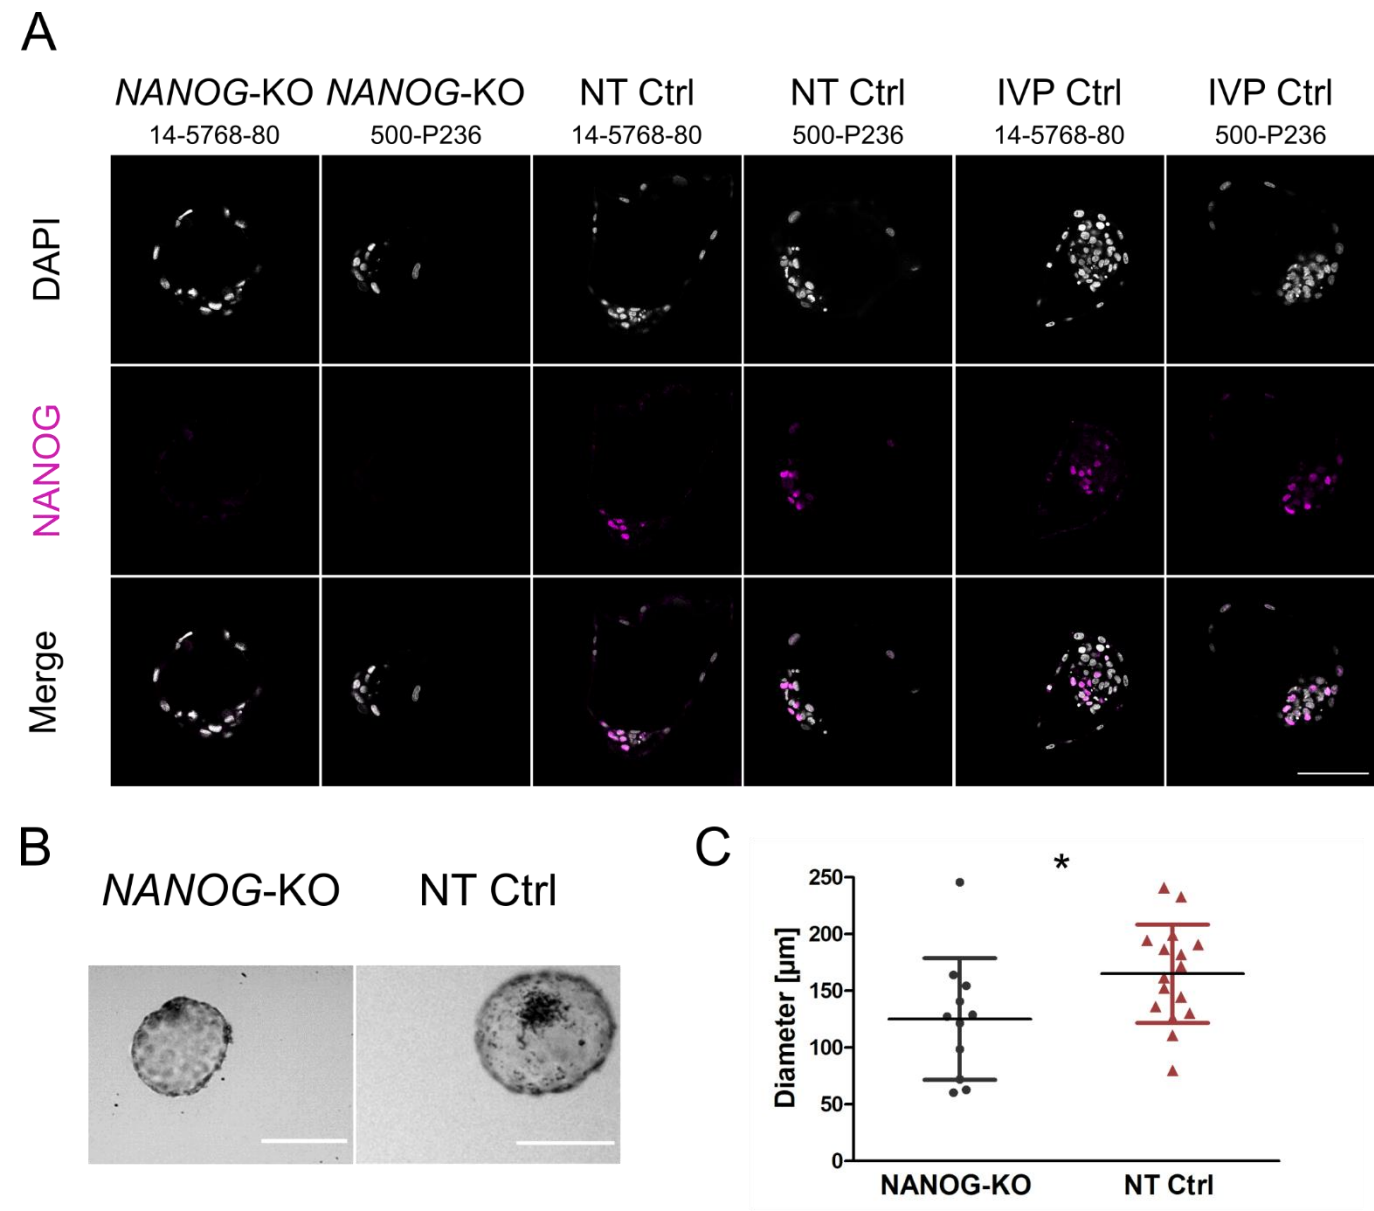

**Figure S1.** Producing bovine *NANOG*-KO embryos via somatic cell nuclear transfer (SCNT). **(A)** Representative confocal planes of day 8 *NANOG*-KO and control blastocysts from somatic cell nuclear transfer (NT Ctrl) and in vitro fertilization (IVP Ctrl) stained for *NANOG* with two different primary antibodies (Table S1). **(B)** Brightfield images of *NANOG*-KO and NT Ctrl day 8 blastocysts. **(C)** Mean diameter  $\pm$  standard deviation of *NANOG*-KO (n=11) and NT Ctrl (n=16) day 8 blastocysts. Data were analyzed by two-tailed Mann-Whitney U test (\*  $p < 0.05$ ). All scale bars indicate 100  $\mu$ m.

2. Figure S2

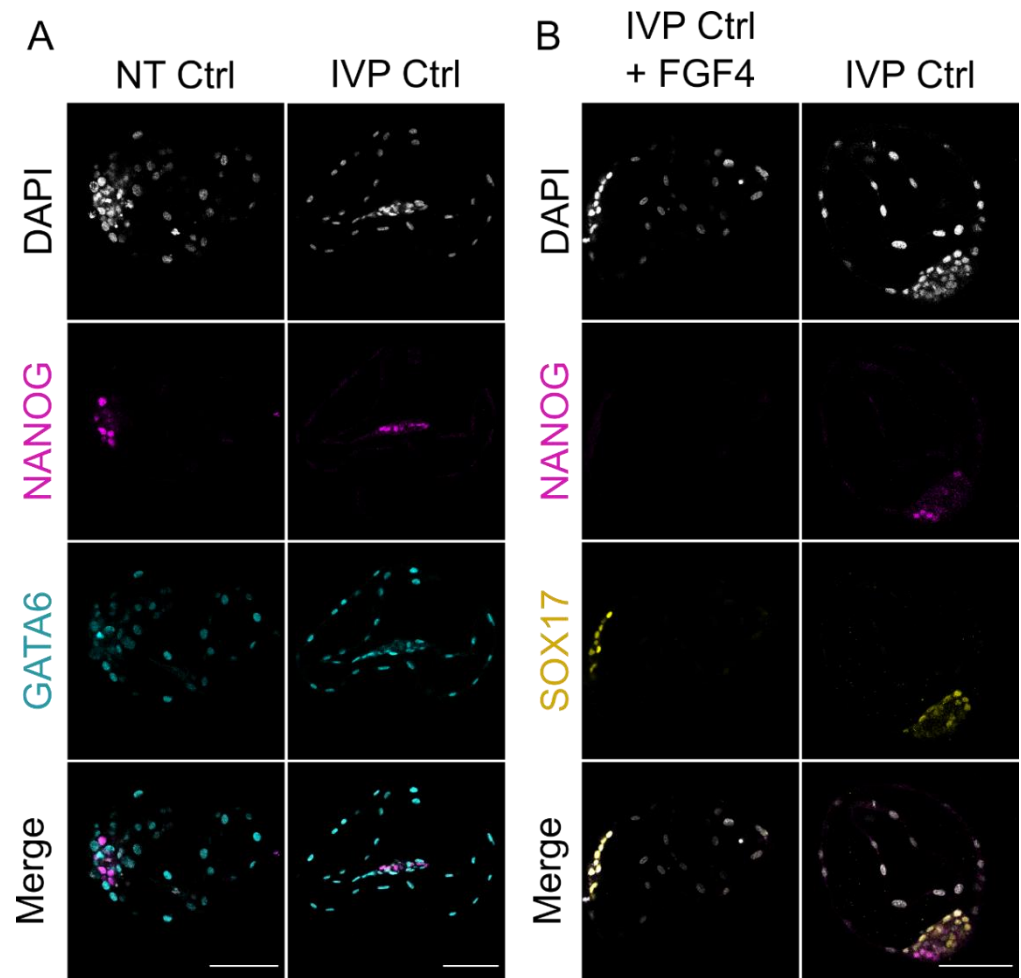

**Figure S2.** Expression of epiblast and hypoblast markers in NT Ctrl and IVP Ctrl day 8 embryos. **(A)** Representative confocal planes of day 8 NT Ctrl and IVP Ctrl blastocysts stained for NANOG and GATA6. **(B)** IVP Ctrl embryos were cultured from morula to day 8 blastocyst in the presence of FGF4 and heparin (each 1  $\mu\text{g/ml}$ ) and stained for NANOG and SOX17. Scale bars indicate 100  $\mu\text{m}$ .

### 3. Table S1

**Table S1.** Targets, antibodies, suppliers and applied dilutions for immunofluorescence staining. Ig = immunoglobulin.

| Target    | Antibody                                        | Supplier                | Dilution                                                       |
|-----------|-------------------------------------------------|-------------------------|----------------------------------------------------------------|
| NANOG_01  | Rabbit anti-human NANOG (500-P236)              | Peprotech               | 1:600                                                          |
| NANOG_02  | Mouse anti-human NANOG (14-5768-80)             | Thermo Fisher           | 1:250                                                          |
| GATA6     | Goat anti-human GATA6 (AF1700)                  | R&D Systems             | 1:500                                                          |
| SOX17     | Goat anti-human SOX17 (AF1924)                  | R&D Systems             | 1:100                                                          |
| SOX2_01   | Goat anti-human SOX2 AF2018                     | R&D Systems             | 1:500                                                          |
| SOX2_02   | Rabbit anti-human SOX2 (AB5603)                 | Millipore               | 1:1000                                                         |
| OCT4      | Rabbit anti-human OCT4 monoclonal ab181557      | Abcam                   | 1:250                                                          |
| CDX2      | Rabbit anti-human CDX22 ab88129                 | Abcam                   | 1:250                                                          |
| Rabbit Ig | Donkey anti-rabbit Alexa Fluor 555 (ab150074)   | Abcam                   | For NANOG_01: 1: 800<br>For OCT4: 1:800<br>For SOX2_02: 1:1000 |
| Rabbit Ig | Donkey anti-rabbit 711-605-152 Alexa 647        | Jackson Immuno Research | For CDX2: 1:400                                                |
| Mouse Ig  | Donkey anti-mouse Alexa Fluor 647 (715-605-150) | Jackson Immuno Research | For NANOG_02: 1:400                                            |
| Goat Ig   | Donkey anti-goat Alexa Fluor 633 (A212082)      | Thermo Fisher           | For GATA6: 1:400                                               |
| Goat Ig   | Bovine anti-goat Alexa Fluor 488 (805-545-180)  | Jackson Immuno Research | For GATA6: 1:1000<br>For SOX17: 1:200<br>For SOX2_01: 1:500    |
